# Supplementary material
Source: publisher figshare collection journal article supplement (https://frontiersin.figshare.com/ndownloader/files/26031980)
Supplement: Supplementary file [file 26031980]

## Supplementary Materials

**Figure S1.**

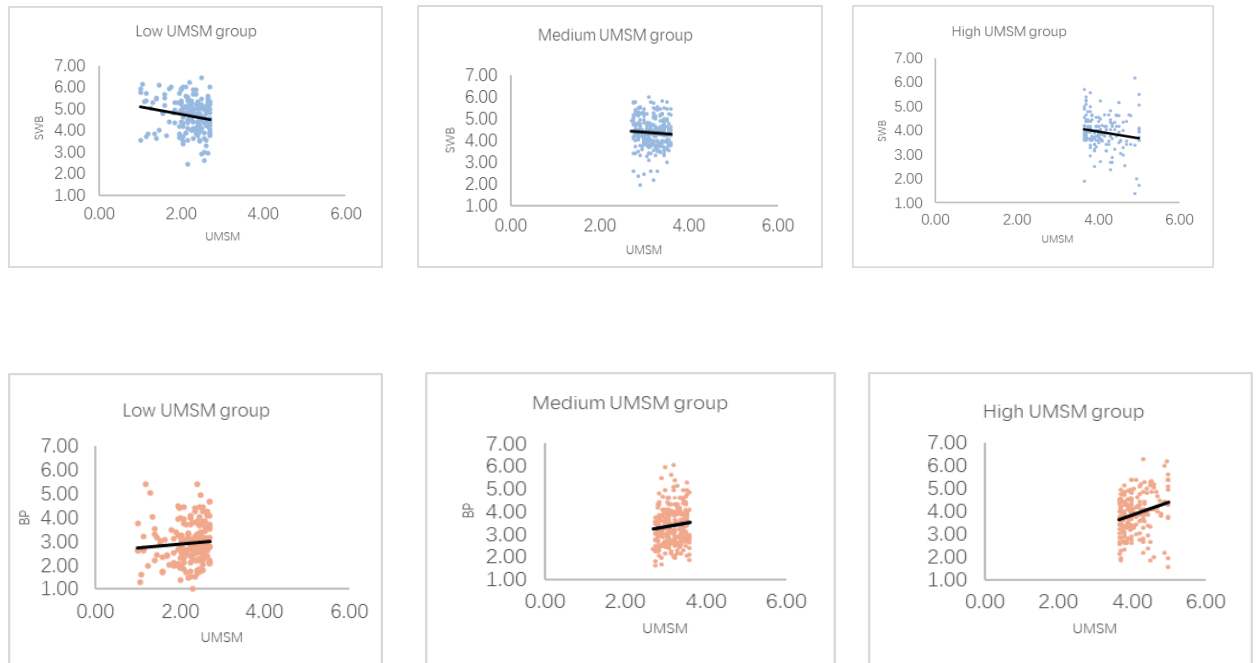

Figure S1. Scatter plot of the correlation of variable under UMSM grouping. UMSM= use of mobile social-media; SWB= subjective well-being; BP= boredom proneness

## Table S1

**Table S1. Total variance explained**

| Component | Initial Eigenvalues |               |              | Extraction Sums of Squared Loadings |               |            |
|-----------|---------------------|---------------|--------------|-------------------------------------|---------------|------------|
|           | Total               | % of Variance | Cumulative % | Total                               | % of Variance | Cumulative |
| 1         | 17.707              | 26.040        | 26.040       | 17.707                              | 26.040        | 26.040     |
| 2         | 6.240               | 9.177         | 35.217       | 6.240                               | 9.177         | 35.217     |
| 3         | 4.873               | 7.166         | 42.383       | 4.873                               | 7.166         | 42.383     |
| 4         | 3.410               | 5.015         | 47.398       | 3.410                               | 5.015         | 47.398     |
| 5         | 2.391               | 3.516         | 50.914       | 2.391                               | 3.516         | 50.914     |
| 6         | 2.037               | 2.996         | 53.910       | 2.037                               | 2.996         | 53.910     |
| 7         | 1.721               | 2.531         | 56.441       | 1.721                               | 2.531         | 56.441     |
| 8         | 1.387               | 2.040         | 58.482       | 1.387                               | 2.040         | 58.482     |
| 9         | 1.316               | 1.936         | 60.417       | 1.316                               | 1.936         | 60.417     |
| 10        | 1.255               | 1.846         | 62.263       | 1.255                               | 1.846         | 62.263     |
| 11        | 1.178               | 1.732         | 63.996       | 1.178                               | 1.732         | 63.996     |
| 12        | 1.027               | 1.510         | 65.506       | 1.027                               | 1.510         | 65.506     |

**Table S2****Table S2. The results of difference analysis on UMSM**

| Variable                                       | Number | UMSM      | t/F       | P     |
|------------------------------------------------|--------|-----------|-----------|-------|
| <b>Time of viewing short video (daily)</b>     |        |           |           |       |
| within 30 minutes                              | 168    | 2.99±0.77 | 6.682***  | 0.000 |
| 30-60 minutes                                  | 163    | 3.08±0.78 |           |       |
| 1-2 hours                                      | 168    | 3.26±0.79 |           |       |
| 2 hours and above                              | 157    | 3.34±0.82 |           |       |
| <b>Use time of mobile social media (daily)</b> |        |           |           |       |
| 2 hours and below                              | 139    | 2.86±0.81 | 10.866*** | 0.000 |
| 2-3 hours                                      | 152    | 3.11±0.75 |           |       |
| 3-5 hours                                      | 167    | 3.29±0.77 |           |       |
| 5 hours and above                              | 198    | 3.30±0.80 |           |       |

Note. UMSM= use of mobile social-media; \*\*\*Correlation is significant at the .001 level (two tailed).

There is a significant difference in scores of the use of mobile social media on the time of viewing short video (daily ( $F=6.682$ ,  $p<0.000$ )). Further multiple comparisons afterwards found that in terms of the use of mobile social-media, the scores of those whose Time of viewing short video (daily) is less than 30 minutes will be significantly lower than that of people who watch 1-2 hours and 2 hours and above, the scores of those who watch 30-60 minutes is significantly lower than that of people who watch 1-2 hours and 2 hours and above.

There is a significant difference in scores of the use of mobile social media due to Use time of mobile social media (daily ( $F=10.866$ ,  $p<0.000$ ;  $F=2.73$ ,  $p<0.043$ )). Further multiple comparisons afterwards found that the subjective well-being of people who used social media for 2 hours or less is higher than that of people who used social media for 5 hours or more.

**Table S3****Table S3. The results of difference analysis on SWB**

| Variable                                       | Number | SWB             | t/F    | P     |
|------------------------------------------------|--------|-----------------|--------|-------|
| <b>Time of viewing short video (daily)</b>     |        |                 |        |       |
| within 30 minutes                              | 168    | 4.36 $\pm$ 0.74 | 2.089  | 0.100 |
| 30-60 minutes                                  | 163    | 4.40 $\pm$ 0.67 |        |       |
| 1-2 hours                                      | 168    | 4.33 $\pm$ 0.79 |        |       |
| 2 hours and above                              | 157    | 4.21 $\pm$ 0.79 |        |       |
| <b>Use time of mobile social media (daily)</b> |        |                 |        |       |
| 2 hours and below                              | 139    | 4.46 $\pm$ 0.75 | 2.731* | 0.043 |
| 2-3 hours                                      | 152    | 4.36 $\pm$ 0.69 |        |       |
| 3-5 hours                                      | 167    | 4.31 $\pm$ 0.76 |        |       |
| 5 hours and above                              | 198    | 4.23 $\pm$ 0.78 |        |       |

Note. SWB= subjective well-being. \*Correlation is significant at the .05 level (two tailed).

There is a significant difference in scores of the use of subjective well-being due to different time lengths of the use time of mobile social media (daily) ( $F=2.73$ ,  $p<0.043$ ). Further multiple comparisons afterwards found that the subjective well-being of people who used social media for 2 hours or less is higher than that of people who used social media for 5 hours or more.

## Table S4

**Table S4. The results of difference analysis on BP**

| Variable                                       | Number | BP         | t/F      | P     |
|------------------------------------------------|--------|------------|----------|-------|
| <b>Time of viewing short video (daily)</b>     |        |            |          |       |
| within 30 minutes                              | 168    | 3.28 ±0.93 | 6.358*** | 0.000 |
| 30-60 minutes                                  | 163    | 3.28 ±0.84 |          |       |
| 1-2 hours                                      | 168    | 3.42 ±0.91 |          |       |
| 2 hours and above                              | 157    | 3.67 ±0.96 |          |       |
| <b>Use time of mobile social media (daily)</b> |        |            |          |       |
| 2 hours and below                              | 139    | 3.30 ±0.95 | 1.824    | 0.141 |
| 2-3 hours                                      | 152    | 3.34 ±0.82 |          |       |
| 3-5 hours                                      | 167    | 3.44 ±0.93 |          |       |
| 5 hours and above                              | 198    | 3.51 ±0.96 |          |       |

Note. BP= boredom proneness. \*\*\*Correlation is significant at the .001 level (two tailed).

There is a significant difference in scores of boredom proneness on the time of viewing short video (daily) ( $F=6.358$ ,  $p<0.000$ ). In terms of boredom proneness, the scores of people whose the time of viewing short video (daily) is less than 30 minutes, 30-60 minutes, and 1-2 hours are significantly lower than that of people who watch 2 hours and above. Overall, those users who watched short videos for more than 2 hours experience a higher degree of boredom proneness

## Table S5

**Table S5. Correlation matrix of various variables in low-level UMSM group**

|      | UMSM    | SWB      | BP |
|------|---------|----------|----|
| UMSM | 1       |          |    |
| SWB  | -.200** | 1        |    |
| BP   | 0.090   | -.446*** | 1  |

Note. UMSM= use of mobile social-media; SWB= subjective well-being; BP= boredom proneness; \*\*Correlation is significant at the .01 level (two tailed). \*\*\*Correlation is significant at the .001 level (two tailed).

In the low-level group of mobile social media usage, SWB and UMSM are significantly negatively correlated, and BP is significantly negatively correlated, while BP and UMSM are not significantly correlated.

## Table S6

**Table S6. Correlation matrix of various variables in medium-level UMSM group**

|      | UMSM   | SWB      | BP |
|------|--------|----------|----|
| UMSM | 1      |          |    |
| SWB  | -0.052 | 1        |    |
| BP   | 0.098  | -.576*** | 1  |

Note. UMSM= use of mobile social-media; SWB= subjective well-being; BP= boredom  
proneness; \*\*\*Correlation is significant at the .001 level (two tailed).

In the medium-level group of mobile social media use, SWB and UMSM are  
significantly negatively correlated with BP; while BP and UMSM are not significantly correlated.

## Table S7

**Table S7. Correlation matrix of various variables in high-level UMSM group**

|      | UMSM   | SWB      | BP |
|------|--------|----------|----|
| UMSM | 1      |          |    |
| SWB  | -.162* | 1        |    |
| BP   | .244** | -.575*** | 1  |

Note. UMSM= use of mobile social-media; SWB= subjective well-being; BP= boredom proneness; \*Correlation is significant at the .05 level (two tailed); \*\*Correlation is significant at the .01 level (two tailed). \*\*\*Correlation is significant at the .001 level (two tailed).

In the high-level group of mobile social media use, SWB and UMSM are significantly negatively correlated, and BP is significantly negatively correlated; while BP and UMSM are significantly negatively correlated.



**Table S8****Table S8. Re-analysis: the results of difference analysis on UMSM**

| Variable                                |                   | Number | UMSM       | t/F       | P     |
|-----------------------------------------|-------------------|--------|------------|-----------|-------|
| Gender                                  |                   |        |            |           |       |
|                                         | Male              | 237    | 3.28±0.82  | 10.072*** | 0.000 |
|                                         | Female            | 237    | 2.63±0.56  |           |       |
| Age                                     |                   |        |            |           |       |
|                                         | Under 18          | 84     | 2.76±0.78  | 4.155*    | 0.016 |
|                                         | Age of 18-24      | 285    | 3.03±0.75  |           |       |
|                                         | Aged 24 and above | 105    | 2.90.±0.80 |           |       |
| Time of viewing short video (daily)     |                   |        |            |           |       |
|                                         | within 30 minutes | 111    | 2.70±0.78  | 7.626***  | 0.000 |
|                                         | 30-60 minutes     | 107    | 2.89±0.73  |           |       |
|                                         | 1-2 hours         | 123    | 3.13±0.77  |           |       |
|                                         | 2 hours and above | 133    | 3.05±0.75  |           |       |
| Use time of mobile social media (daily) |                   |        |            |           |       |
|                                         | 2 hours and below | 128    | 2.77±0.69  | 5.228**   | 0.001 |
|                                         | 2-3 hours         | 124    | 2.92±0.76  |           |       |
|                                         | 3-5 hours         | 116    | 3.03±0.75  |           |       |
|                                         | 5 hours and above | 106    | 3.14±0.85  |           |       |

Note. UMSM= use of mobile social-media; \*Correlation is significant at the .05 level (two tailed);

\*\*Correlation is significant at the .01 level (two tailed). \*\*\*Correlation is significant at the .001 level (two tailed).

**Table S9**

| Table S9. Re-analysis: the results of difference analysis on SWB |                   |        |            |          |       |
|------------------------------------------------------------------|-------------------|--------|------------|----------|-------|
| Variable                                                         |                   | Number | SWB        | t/F      | P     |
| Gender                                                           |                   |        |            |          |       |
|                                                                  | Male              | 237    | 4.25 ±0.70 | -2.948** | 0.003 |
|                                                                  | Female            | 237    | 4.46 ±0.80 |          |       |
| Age                                                              |                   |        |            |          |       |
|                                                                  | Under 18          | 84     | 4.36 ±0.80 | 1.609    | 0.201 |
|                                                                  | Age of 18-24      | 285    | 4.31 ±0.77 |          |       |
|                                                                  | Aged 24 and above | 105    | 4.47 ±0.70 |          |       |
| Time of viewing short video (daily)                              |                   |        |            |          |       |
|                                                                  | within 30 minutes | 111    | 4.47 ±0.78 | 2.639    | 0.049 |
|                                                                  | 30-60 minutes     | 107    | 4.41 ±0.69 |          |       |
|                                                                  | 1-2 hours         | 123    | 4.35 ±0.72 |          |       |
|                                                                  | 2 hours and above | 133    | 4.21 ±0.82 |          |       |
| Use time of mobile social media (daily)                          |                   |        |            |          |       |
|                                                                  | 2 hours and below | 139    | 4.40 ±0.74 | 2.123    | 0.096 |
|                                                                  | 2-3 hours         | 152    | 4.44 ±0.65 |          |       |
|                                                                  | 3-5 hours         | 167    | 4.35 ±0.79 |          |       |
|                                                                  | 5 hours and above | 198    | 4.20 ±0.85 |          |       |

Note. SWB= subjective well-being. \*\*Correlation is significant at the .01 level (two tailed).

**Table S10****Table S10. Re-analysis: the results of difference analysis on BP**

| Variable                                |                   | Number | BP        | t/F       | P     |
|-----------------------------------------|-------------------|--------|-----------|-----------|-------|
| Gender                                  |                   |        |           |           |       |
|                                         | Male              | 237    | 3.62±0.92 | 4.124***  | 0.000 |
|                                         | Female            | 237    | 3.27±0.88 |           |       |
| Age                                     |                   |        |           |           |       |
|                                         | Under 18          | 84     | 3.76±0.89 | 11.523*** | 0.000 |
|                                         | Age of 18-24      | 285    | 3.46±0.89 |           |       |
|                                         | Aged 24 and above | 105    | 3.14±0.95 |           |       |
| Time of viewing short video (daily)     |                   |        |           |           |       |
|                                         | within 30 minutes | 111    | 3.35±0.97 | 1.075     | 0.359 |
|                                         | 30-60 minutes     | 107    | 3.39±0.83 |           |       |
|                                         | 1-2 hours         | 123    | 3.47±0.90 |           |       |
|                                         | 2 hours and above | 133    | 3.55±0.96 |           |       |
| Use time of mobile social media (daily) |                   |        |           |           |       |
|                                         | 2 hours and below | 139    | 3.31±0.94 | 5.004***  | 0.002 |
|                                         | 2-3 hours         | 152    | 3.33±0.82 |           |       |
|                                         | 3-5 hours         | 167    | 3.46±0.87 |           |       |
|                                         | 5 hours and above | 198    | 3.73±1.00 |           |       |

Note. BP= boredom proneness. \*\*\*Correlation is significant at the .001 level (two tailed).

**Table S11****Table S11. Re-analysis: correlation between variables**

|                           | M    | SD   | 1         | 2        | 3        | 4        | 5        | 6        | 7        | 8 |
|---------------------------|------|------|-----------|----------|----------|----------|----------|----------|----------|---|
| 1 SWB                     | 2.95 | 0.77 | 1         |          |          |          |          |          |          |   |
| 2 UMSM                    | 4.35 | 0.76 | -0.390*** | 1        |          |          |          |          |          |   |
| 3 viscosity<br>increase   | 3.28 | 0.93 | -0.253*** | 0.786*** | 1        |          |          |          |          |   |
| 4 physiological<br>damage | 2.77 | 0.92 | -0.351*** | 0.834*** | 0.511*** | 1        |          |          |          |   |
| 5 omission<br>anxiety     | 2.86 | 0.96 | -0.346*** | 0.851*** | 0.607*** | 0.627*** | 1        |          |          |   |
| 6 cognitive<br>failure    | 2.88 | 0.93 | -0.329*** | 0.825*** | 0.504*** | 0.618*** | 0.650*** | 1        |          |   |
| 7 guilt                   | 2.95 | 1.43 | -0.289*** | 0.681*** | 0.396*** | 0.501*** | 0.495*** | 0.563*** | 1        |   |
| 8 BP                      | 3.44 | 0.92 | -0.604*** | 0.461*** | 0.333*** | 0.378*** | 0.388*** | 0.399*** | 0.357*** | 1 |

Note. UMSM= use of mobile social-media; SWB= subjective well-being; BP= boredom  
prone; \*\*\*Correlation is significant at the 0.001 level (two tailed).

## Table S12

**Table S12. Re-analysis: correlation matrix of various variables in low-level UMSM group**

|      | UMSM    | SWB      | BP |
|------|---------|----------|----|
| UMSM | 1       |          |    |
| SWB  | -.200** | 1        |    |
| BP   | 0.090   | -.446*** | 1  |

Note. UMSM= use of mobile social-media; SWB= subjective well-being; BP= boredom proneness; \*\*Correlation is significant at the .01 level (two tailed). \*\*\*Correlation is significant at the .001 level (two tailed).

## Table S13

**Table S13. Re-analysis: correlation matrix of various variables in medium-level UMSM group**

|      | UMSM   | SWB      | BP |
|------|--------|----------|----|
| UMSM | 1      |          |    |
| SWB  | -0.016 | 1        |    |
| BP   | 0.082  | -.542*** | 1  |

Note. UMSM= use of mobile social-media; SWB= subjective well-being; BP= boredom proneness; \*\*\*Correlation is significant at the .001 level (two tailed).

## Table S14

**Table S14. Re-analysis: correlation matrix of various variables in high-level UMSM group**

|      | UMSM   | SWB      | BP |
|------|--------|----------|----|
| UMSM | 1      |          |    |
| SWB  | -.217* | 1        |    |
| BP   | .238*  | -.662*** | 1  |

Note. UMSM= use of mobile social-media; SWB= subjective well-being; BP= boredom  
proneness; \*Correlation is significant at the .05 level (two tailed); \*\*\*Correlation is  
significant at the .001 level (two tailed).

**Table S15****Table S15. Re-analysis: regression analysis of use of mobile social-media and SWB**

| Dependent variable | Independent variable | R     | R <sup>2</sup> | $\Delta R^2$ | F      | $\beta$ | Beta   | t        |
|--------------------|----------------------|-------|----------------|--------------|--------|---------|--------|----------|
| SWB                | Physiological damage | 0.351 | 0.123          | 0.121        | 66.278 | -0.154  | -0.187 | -3.296** |
|                    | Omission anxiety     | 0.386 | 0.149          | 0.146        | 41.305 | -0.138  | -0.175 | -3.100** |
|                    | guilt                | 0.397 | 0.157          | 0.152        | 29.286 | -0.069  | -0.109 | -2.148*  |

Note. SWB= subjective well-being; \*Correlation is significant at the .05 level (two tailed);

\*\*Correlation is significant at the .01 level (two tailed).



## Table S16

**Table S16. Re-analysis: the test of mediating effect of use of mobile social-media, boredom proneness and SWB**

| Mediator             | Effect          | Effect size | Effect ratio | Boot SE | BootCI LL | BootCI UL |
|----------------------|-----------------|-------------|--------------|---------|-----------|-----------|
| Boredom<br>proneness | Total effect    | -0.3840***  |              | 0.0417  | -0.4659   | -0.3021   |
|                      | Direct effect   | -0.1397***  |              | 0.0402  | -0.2187   | -0.0607   |
|                      | Indirect effect | -0.2443***  | 63.63%       | 0.0344  | -0.3147   | -0.1797   |

Note. BP= boredom proneness; \*\*\*Correlation is significant at the .001 level (two tailed).
